# Supplementary material for: Inhibition of miR-96-5p in the mouse brain increases glutathione levels by altering NOVA1 expression
Source: PubMed Central journal article supplement (PMC7876013; doi:10.1038/s42003-021-01706-0), 2021-02-10
Supplement: 42003_2021_1706_MOESM1_ESM.pdf [file 42003_2021_1706_MOESM1_ESM.pdf]

Supplementary Information for:

Inhibition of miR-96-5p in the mouse brain increases glutathione levels by altering NOVA1 expression

Authors: Chisato Kinoshita<sup>1</sup>, Kazue Kikuchi-Utsumi<sup>1</sup>, Koji Aoyama<sup>1</sup>, Ryo Suzuki<sup>2</sup>, Yayoi Okamoto<sup>1,3</sup>, Nobuko Matsumura<sup>1</sup>, Daiki Omata<sup>2</sup>, Kazuo Maruyama<sup>4</sup> and Toshio Nakaki<sup>1,5,\*</sup>

Affiliation: <sup>1</sup>Department of Pharmacology, Teikyo University School of Medicine, 2-11-1 Kaga, Itabashi, Tokyo 173-8605, Japan

<sup>2</sup>Laboratory of Drug and Gene Delivery, Faculty of Pharma-Science, Teikyo University, 2-11-1 Kaga, Itabashi, Tokyo 173-8605, Japan

<sup>3</sup>Teikyo University Support Center for Women Physicians and Researchers, 2-11-1 Kaga, Itabashi, Tokyo 173-8605, Japan

<sup>4</sup>Laboratory of Theranostics, Faculty of Pharma-Science, Teikyo University, 2-11-1 Kaga, Itabashi, Tokyo 173-8605, Japan

<sup>5</sup>Faculty of Pharma-Science, Teikyo University, 2-11-1 Kaga, Itabashi, Tokyo 173-8605, Japan

\*Corresponding author: Toshio Nakaki

Tel: +81-3-3964-1211 (ext: 45203)

Fax: +81-3-3964-0602

E-mail: nakaki@med.teikyo-u.ac.jp

## Supplementary Table 1

| Gel      | MASCOT MS/MS ion-search result                                                                  |                                                                                                                          |         |          |            |       |          |          |           |              | miR-96-5p target prediction |  |
|----------|-------------------------------------------------------------------------------------------------|--------------------------------------------------------------------------------------------------------------------------|---------|----------|------------|-------|----------|----------|-----------|--------------|-----------------------------|--|
|          | Accession                                                                                       | Description                                                                                                              | Score   | Coverage | # Peptides | # AAs | MW [kDa] | calc. pI | P value   | miRSVR score | PhastCons Score             |  |
| 43.1 kDa | Q99L45                                                                                          | Eukaryotic translation initiation factor 2 subunit 2 OS=Mus musculus GN=EIF2s2 PE=1 SV=1 - [IF2B_MOUSE]                  | 1134.22 | 49.85    | 18         | 331   | 38.1     | 5.80     | 3.78E-114 | -0.1019      | 0.7071                      |  |
|          | O70172                                                                                          | Phosphatidylinositol 5-phosphate 4-kinase type-2 alpha OS=Mus musculus GN=Pip4k2a PE=1 SV=1 - [PI42A_MOUSE]              | 387.01  | 23.70    | 10         | 405   | 46.1     | 6.99     | 1.99E-39  | -0.0075      | 0.5514                      |  |
|          | Q60668                                                                                          | Heterogeneous nuclear ribonucleoprotein D0 OS=Mus musculus GN=Hnmpd PE=1 SV=2 - [HNRPD_MOUSE]                            | 329.31  | 25.07    | 8          | 355   | 38.3     | 7.81     | 1.17E-33  | -0.0022      | 0.6743                      |  |
|          | Q9JK96                                                                                          | RNA-binding protein Nova-1 OS=Mus musculus GN=Nov1 PE=1 SV=2 - [NOVA1_MOUSE]                                             | 100.75  | 7.10     | 3          | 507   | 51.7     | 8.72     | 8.42E-11  | -1.2513      | 0.8601                      |  |
|          | Q9QYR6                                                                                          | Microtubule-associated protein 1A OS=Mus musculus GN=Map1a PE=1 SV=2 - [MAP1A_MOUSE]                                     | 93.69   | 1.22     | 3          | 2776  | 300.0    | 5.00     | 4.27E-10  | -0.0043      | 0.5447                      |  |
|          | Q9WW60                                                                                          | Glycogen synthase kinase-3 beta OS=Mus musculus GN=Gsk3b PE=1 SV=2 - [GSK3B_MOUSE]                                       | 69.32   | 6.90     | 3          | 420   | 46.7     | 8.78     | 1.17E-07  | -0.0003      | 0.5645                      |  |
|          | A2A935                                                                                          | PR domain zinc finger protein 16 OS=Mus musculus GN=Prdm16 PE=1 SV=1 - [PRD16_MOUSE]                                     | 63.19   | 0.71     | 1          | 1275  | 140.8    | 6.10     | 4.80E-07  | -0.1834      | 0.5619                      |  |
|          | P20357                                                                                          | Microtubule-associated protein 2 OS=Mus musculus GN=Map2 PE=1 SV=2 - [MTAP2_MOUSE]                                       | 59.31   | 1.97     | 3          | 1828  | 199.0    | 4.91     | 1.17E-06  | -0.0192      | 0.5153                      |  |
|          | O55131                                                                                          | Septin-7 OS=Mus musculus GN=Sept7 PE=1 SV=1 - [SEPT7_MOUSE]                                                              | 52.35   | 4.36     | 2          | 436   | 50.5     | 8.57     | 5.82E-06  | -0.9434      | 0.7536                      |  |
|          | P61164                                                                                          | Alpha-centractin OS=Mus musculus GN=Actr1a PE=2 SV=1 - [ACTZ_MOUSE]                                                      | 31.65   | 3.99     | 2          | 376   | 42.6     | 6.64     | 6.83E-04  | -0.2171      | 0.5431                      |  |
|          | Q9JK96                                                                                          | RNA-binding protein Nova-1 OS=Mus musculus GN=Nov1 PE=1 SV=2 - [NOVA1_MOUSE]                                             | 498.27  | 23.27    | 13         | 507   | 51.7     | 8.72     | 1.49E-50  | -1.2513      | 0.8601                      |  |
|          | P62814                                                                                          | V-type proton ATPase subunit B, brain isoform OS=Mus musculus GN=Atp6v1b2 PE=1 SV=1 - [VATB2_MOUSE]                      | 225.71  | 10.18    | 6          | 511   | 56.5     | 5.81     | 2.68E-23  | -0.1299      | 0.7481                      |  |
|          | Q8VJ36                                                                                          | Splicing factor, proline- and glutamine-rich OS=Mus musculus GN=Sfpq PE=1 SV=1 - [SFPQ_MOUSE]                            | 221.46  | 4.43     | 3          | 699   | 75.4     | 9.44     | 7.15E-23  | -0.0465      | 0.6582                      |  |
|          | Q8VD63                                                                                          | Testis-specific Y-encoded-like protein 4 OS=Mus musculus GN=Tspy4 PE=2 SV=1 - [TSPY4_MOUSE]                              | 180.92  | 14.04    | 5          | 406   | 44.8     | 6.99     | 8.09E-19  | -0.0087      | 0.6623                      |  |
|          | Q9WUM4                                                                                          | Coronin-1C OS=Mus musculus GN=Coro1c PE=1 SV=2 - [COR1C_MOUSE]                                                           | 179.11  | 12.66    | 6          | 474   | 53.1     | 7.08     | 1.23E-18  | -0.0778      | 0.6578                      |  |
| P56959   | RNA-binding protein FUS OS=Mus musculus GN=Fus PE=2 SV=1 - [FUS_MOUSE]                          | 157.83                                                                                                                   | 8.69    | 3        | 518        | 52.6  | 9.36     | 1.65E-16 | -0.0622   | 0.5644       |                             |  |
| P68368   | Tubulin alpha-4 chain OS=Mus musculus GN=Tuba4a PE=1 SV=1 - [TBA4A_MOUSE]                       | 149.21                                                                                                                   | 15.18   | 7        | 448        | 49.9  | 5.06     | 1.20E-15 | -0.0033   | 0.5957       |                             |  |
| 51.3 kDa | Q6PH2Z                                                                                          | Calcium/calmodulin-dependent protein kinase type II subunit delta OS=Mus musculus GN=Camk2d PE=1 SV=1 - [KCC2D_MOUSE]    | 146.93  | 8.42     | 4          | 499   | 56.3     | 7.25     | 2.03E-15  | -0.0144      | 0.5589                      |  |
|          | Q92379                                                                                          | Calcium/calmodulin-dependent protein kinase type II subunit gamma OS=Mus musculus GN=Camk2g PE=1 SV=1 - [KCC2G_MOUSE]    | 142.52  | 12.10    | 6          | 529   | 59.6     | 7.58     | 5.60E-15  | -0.0215      | 0.7159                      |  |
|          | O54724                                                                                          | Polymerase I and transcript release factor OS=Mus musculus GN=Prtf PE=1 SV=1 - [PTRF_MOUSE]                              | 125.91  | 11.73    | 4          | 392   | 43.9     | 5.52     | 2.57E-13  | -0.0039      | 0.6006                      |  |
|          | P27546                                                                                          | Microtubule-associated protein 4 OS=Mus musculus GN=Map4 PE=1 SV=3 - [MAP4_MOUSE]                                        | 63.44   | 2.31     | 2          | 1125  | 117.4    | 4.98     | 4.53E-07  | -0.0113      | 0.4873                      |  |
|          | P20357                                                                                          | Microtubule-associated protein 2 OS=Mus musculus GN=Map2 PE=1 SV=2 - [MTAP2_MOUSE]                                       | 58.46   | 0.88     | 1          | 1828  | 199.0    | 4.91     | 1.43E-06  | -0.0192      | 0.5153                      |  |
|          | Q8C8N2                                                                                          | Protein SCA1 OS=Mus musculus GN=Scal PE=1 SV=2 - [SCA1_MOUSE]                                                            | 56.92   | 3.14     | 2          | 606   | 70.2     | 8.60     | 2.03E-06  | -0.0038      | 0.6005                      |  |
|          | Q9QYR6                                                                                          | Microtubule-associated protein 1A OS=Mus musculus GN=Map1a PE=1 SV=2 - [MAP1A_MOUSE]                                     | 55.09   | 0.83     | 2          | 2776  | 300.0    | 5.00     | 3.10E-06  | -0.0056      | 0.57                        |  |
|          | Q9EQ20                                                                                          | Methylmalonate-semialdehyde dehydrogenase [acylating], mitochondrial OS=Mus musculus GN=Aldh6a1 PE=1 SV=1 - [HMSA_MOUSE] | 40.42   | 1.87     | 1          | 535   | 57.9     | 8.07     | 9.08E-05  | -0.0043      | 0.5447                      |  |
|          | O08739                                                                                          | AMP deaminase 3 OS=Mus musculus GN=Ampd3 PE=2 SV=2 - [AMPD3_MOUSE]                                                       | 37.11   | 1.17     | 1          | 766   | 88.6     | 7.33     | 1.95E-04  | -0.0078      | 0.5876                      |  |
|          | O35841                                                                                          | Apoptosis inhibitor 5 OS=Mus musculus GN=Api5 PE=1 SV=2 - [API5_MOUSE]                                                   | 29.79   | 1.79     | 1          | 504   | 56.7     | 5.92     | 1.05E-03  | -0.0338      | 0.7431                      |  |
|          | P10637                                                                                          | Microtubule-associated protein tau OS=Mus musculus GN=Mapt PE=1 SV=3 - [TAU_MOUSE]                                       | 29.10   | 2.05     | 1          | 733   | 76.2     | 6.79     | 1.23E-03  | -0.0168      | 0.5994                      |  |
|          | Q8BTV2                                                                                          | Cleavage and polyadenylation specificity factor subunit 7 OS=Mus musculus GN=Cpsf7 PE=1 SV=2 - [CPSF7_MOUSE]             | 22.20   | 1.70     | 1          | 471   | 52.0     | 8.00     | 6.03E-03  | -0.0002      | 0.5349                      |  |
|          | O08739                                                                                          | AMP deaminase 3 OS=Mus musculus GN=Ampd3 PE=2 SV=2 - [AMPD3_MOUSE]                                                       | 1128.09 | 26.37    | 22         | 766   | 88.6     | 7.33     | 1.55E-113 | -0.0279      | 0.6897                      |  |
|          | Q8BZ98                                                                                          | Dynamin-3 OS=Mus musculus GN=Dnm3 PE=1 SV=1 - [DYN3_MOUSE]                                                               | 458.59  | 12.98    | 12         | 863   | 97.1     | 8.35     | 1.38E-46  | -0.0028      | 0.5952                      |  |
|          | Q9VJ36                                                                                          | Splicing factor, proline- and glutamine-rich OS=Mus musculus GN=Sfpq PE=1 SV=1 - [SFPQ_MOUSE]                            | 202.04  | 12.59    | 8          | 699   | 75.4     | 9.44     | 6.25E-21  | -0.0465      | 0.6582                      |  |
| Q03141   | MAP/microtubule affinity-regulating kinase 3 OS=Mus musculus GN=Mark3 PE=1 SV=2 - [MARK3_MOUSE] | 197.80                                                                                                                   | 10.62   | 7        | 753        | 84.3  | 9.51     | 1.66E-20 | -0.0828   | 0.6587       |                             |  |
| Q05512   | Serine/threonine-protein kinase MARK2 OS=Mus musculus GN=Mark2 PE=1 SV=3 - [MARK2_MOUSE]        | 106.65                                                                                                                   | 3.74    | 2        | 776        | 86.3  | 9.67     | 2.16E-11 | -0.0024   | 0.5652       |                             |  |
| Q92Z68   | RasGAP-activating-like protein 1 OS=Mus musculus GN=Rasa1 PE=2 SV=2 - [RASL1_MOUSE]             | 101.18                                                                                                                   | 3.75    | 3        | 799        | 89.3  | 6.37     | 7.62E-11 | -0.0025   | 0.5704       |                             |  |
| 80.7 kDa | Q9DBG3                                                                                          | AP-2 complex subunit beta OS=Mus musculus GN=Ap2b1 PE=1 SV=1 - [AP2B1_MOUSE]                                             | 69.16   | 4.16     | 4          | 937   | 104.5    | 5.38     | 1.21E-07  | -0.2615      | 0.644                       |  |
|          | P28740                                                                                          | Kinesin-like protein KIF2a OS=Mus musculus GN=Kif2a PE=1 SV=2 - [KIF2A_MOUSE]                                            | 57.98   | 3.12     | 3          | 705   | 79.7     | 6.73     | 1.59E-06  | -0.001       | 0.5424                      |  |
|          | Q9WW92                                                                                          | Band 4.1-like protein 3 OS=Mus musculus GN=Epb4113 PE=1 SV=1 - [E41L3_MOUSE]                                             | 47.92   | 1.83     | 2          | 929   | 103.3    | 5.31     | 1.61E-05  | -0.1331      | 0.7069                      |  |
|          | Q68FF6                                                                                          | ARF GTPase-activating protein GIT1 OS=Mus musculus GN=Git1 PE=1 SV=1 - [GIT1_MOUSE]                                      | 39.76   | 1.17     | 1          | 770   | 85.2     | 6.93     | 1.06E-04  | -0.0028      | 0.5952                      |  |
|          | Q8VJ36                                                                                          | Splicing factor, proline- and glutamine-rich OS=Mus musculus GN=Sfpq PE=1 SV=1 - [SFPQ_MOUSE]                            | 5877.73 | 35.34    | 25         | 699   | 75.4     | 9.44     | 0.00E+00  | -0.0465      | 0.6582                      |  |
|          | O35066                                                                                          | Kinesin-like protein KIF3C OS=Mus musculus GN=Kif3c PE=1 SV=3 - [KIF3C_MOUSE]                                            | 1085.44 | 30.65    | 23         | 796   | 89.9     | 8.06     | 2.86E-109 | -0.0494      | 0.5988                      |  |
|          | P28740                                                                                          | Kinesin-like protein KIF2a OS=Mus musculus GN=Kif2a PE=1 SV=2 - [KIF2A_MOUSE]                                            | 1073.71 | 28.09    | 22         | 705   | 79.7     | 6.73     | 4.26E-108 | -0.1331      | 0.7069                      |  |
|          | O70318                                                                                          | Band 4.1-like protein 2 OS=Mus musculus GN=Epb4112 PE=1 SV=2 - [E41L2_MOUSE]                                             | 747.31  | 21.86    | 20         | 988   | 109.9    | 5.43     | 1.86E-75  | -0.1136      | 0.7264                      |  |
|          | Q9WW92                                                                                          | Band 4.1-like protein 3 OS=Mus musculus GN=Epb4113 PE=1 SV=1 - [E41L3_MOUSE]                                             | 119.74  | 4.20     | 4          | 929   | 103.3    | 5.31     | 1.06E-12  | -1.1251      | 0.6907                      |  |
|          | Q8BXX8                                                                                          | Arf-GAP with GTPase, ANK repeat and PH domain-containing protein 1 OS=Mus musculus GN=Agap1 PE=2 SV=1 - [AGAP1_MOUSE]    | 113.46  | 4.43     | 4          | 857   | 94.4     | 7.94     | 4.51E-12  | -0.0001      | 0.5172                      |  |
| 89.2 kDa | Q92ZH5                                                                                          | Band 4.1-like protein 1 OS=Mus musculus GN=Epb4111 PE=1 SV=2 - [E41L1_MOUSE]                                             | 69.97   | 2.50     | 2          | 879   | 98.3     | 5.62     | 1.01E-07  | -0.0002      | 0.5317                      |  |
|          | Q9DBG3                                                                                          | AP-2 complex subunit beta OS=Mus musculus GN=Ap2b1 PE=1 SV=1 - [AP2B1_MOUSE]                                             | 50.28   | 1.49     | 2          | 937   | 104.5    | 5.38     | 9.38E-06  | -0.0054      | 0.6166                      |  |
|          | Q8VJ36                                                                                          | Splicing factor, proline- and glutamine-rich OS=Mus musculus GN=Sfpq PE=1 SV=1 - [SFPQ_MOUSE]                            | 2121.94 | 31.76    | 23         | 699   | 75.4     | 9.44     | 6.39E-213 | -0.0068      | 0.7237                      |  |
|          | P28740                                                                                          | Kinesin-like protein KIF2a OS=Mus musculus GN=Kif2a PE=1 SV=2 - [KIF2A_MOUSE]                                            | 1538.64 | 30.07    | 24         | 705   | 79.7     | 6.73     | 1.37E-154 | -0.0068      | 0.7237                      |  |
|          | Q9DBG3                                                                                          | AP-2 complex subunit beta OS=Mus musculus GN=Ap2b1 PE=1 SV=1 - [AP2B1_MOUSE]                                             | 190.98  | 10.14    | 10         | 937   | 104.5    | 5.38     | 7.97E-20  | -0.2615      | 0.644                       |  |
|          | Q9QYR6                                                                                          | Microtubule-associated protein 1A OS=Mus musculus GN=Map1a PE=1 SV=2 - [MAP1A_MOUSE]                                     | 190.66  | 2.23     | 6          | 2776  | 300.0    | 5.00     | 8.59E-20  | -0.0043      | 0.5447                      |  |
|          | Q8BXX8                                                                                          | Arf-GAP with GTPase, ANK repeat and PH domain-containing protein 1 OS=Mus musculus GN=Agap1 PE=2 SV=1 - [AGAP1_MOUSE]    | 114.79  | 4.43     | 4          | 857   | 94.4     | 7.94     | 3.32E-12  | -0.0001      | 0.5172                      |  |
|          | P58069                                                                                          | Ras GTPase-activating protein 2 OS=Mus musculus GN=Rasa2 PE=1 SV=2 - [RASA2_MOUSE]                                       | 101.41  | 3.19     | 3          | 847   | 96.3     | 7.59     | 7.23E-11  | -0.0068      | 0.7237                      |  |
|          | P97386                                                                                          | DNA ligase 3 OS=Mus musculus GN=Lig3 PE=1 SV=2 - [DNL3_MOUSE]                                                            | 89.22   | 3.74     | 4          | 1015  | 113.0    | 8.98     | 1.20E-09  | -0.0005      | 0.3903                      |  |
|          | Q62448                                                                                          | Eukaryotic translation initiation factor 4 gamma 2 OS=Mus musculus GN=EIF4g2 PE=1 SV=2 - [IF4G2_MOUSE]                   | 49.00   | 1.88     | 2          | 906   | 102.0    | 7.14     | 1.26E-05  | -0.2242      | 0.7629                      |  |
| Q92ZH5   | Band 4.1-like protein 1 OS=Mus musculus GN=Epb4111 PE=1 SV=2 - [E41L1_MOUSE]                    | 48.11                                                                                                                    | 1.14    | 1        | 879        | 98.3  | 5.62     | 1.55E-05 | -0.0054   | 0.6166       |                             |  |
| O70318   | Band 4.1-like protein 2 OS=Mus musculus GN=Epb4112 PE=1 SV=2 - [E41L2_MOUSE]                    | 43.50                                                                                                                    | 2.23    | 2        | 988        | 109.9 | 5.43     | 4.47E-05 | -0.0068   | 0.7237       |                             |  |

List of binding protein candidates for GTRAP3-18 3'-UTR analyzed by nano-LC MS/MS ion-search, which are also analyzed by miRNA prediction algorithm for miR-96-5p targeting.

## Supplementary Table 2

| miRNA mimic            |         | Sequence                                      |
|------------------------|---------|-----------------------------------------------|
| negative control       |         | 5'-UCACCGGGUGUAAAUCAGCUUG-3'                  |
| miR-96-5p              |         | 5'-UUUGGCACUAGCACAUUUUUUGCU-3'                |
| miRNA inhibitor        |         | Sequence                                      |
| negative control       |         | 5'-TAACACGTCTATACGCCCA-3'                     |
| miR-96-5p              |         | 5'-GCAAAAATGTGCTAGTGCCAA-3'                   |
| Cloning of 3'-UTR      |         | Primer sequence                               |
| GTRAP3-18              | Forward | 5'-GAGCTCACATAACTTACCTGAGCTAGG-3'             |
|                        | Reverse | 5'-ACGCGTAAATAAAGTCTCACC-3'                   |
| NOVA1                  | Forward | 5'-GAGCTCGTGCCCCAGTTACACATCAGA-3'             |
|                        | Reverse | 5'-GCCGGCTGATGCTACATGATGAACTA-3'              |
| Mutagenesis            |         | Primer sequence                               |
| GTRAP3-18 Ptbp1-mut    | Forward | 5'- TCTTCTTGA CTTCTCAGACATGGTCTAGAATC -3'     |
|                        | Reverse | 5'-GACAAGTCAAGAAGATATCACTGTGCTAAAGA-3'        |
| GTRAP3-18 unbound-mut  | Forward | 5'-TGTCGTTGACTTGTGACAGACATGGTCTAGAATC -3'     |
|                        | Reverse | 5'-GACAAGTCAACGACATATCACTGTGCTAAAGA-3'        |
| GTRAP3-18 deletion-mut | Forward | 5'-CAGTGATAGACTTCACAGACATGGTC -3'             |
|                        | Reverse | 5'-GTGAAGTCTATCACTGTGCTAAAGATC-3'             |
| NOVA1 mut1             | Forward | 5'-GAAAGTCGGAACAAATTATTGATAGCT-3'             |
|                        | Reverse | 5'-TTTGTTCCGACTTTCACTTTTGTTTAT-3'             |
| NOVA1 mut2             | Forward | 5'-CTGAGTCGGAAGTGTCCAGGCCATTTG-3'             |
|                        | Reverse | 5'-ACAGTCCGACTCAGGAGAGGTACAGA-3'              |
| quantified RT-PCR      |         | Primer sequence                               |
| GTRAP3-18              | Forward | 5'- GGAACAACCGTGTAGTGAGCAA -3'                |
|                        | Reverse | 5'- TGATGCCGAACACAAAGACC -3'                  |
| NOVA1                  | Forward | 5'-AGTATCCTACAACCTCAG -3'                     |
|                        | Reverse | 5'- CTCCATTATAGCCTTCAC-3'                     |
| GAPDH                  | Forward | 5'- AAAATGGTGAAGGTCGGTGTG -3'                 |
|                        | Reverse | 5'- AATGAAGGGTTCGTTGATGG -3'                  |
| RNA synthesis          |         | Primer sequence                               |
| GTRAP3-18              | Forward | 5'-TAATACGACTCACTATAGGGAGAACATAACTTACCTGA-3'  |
|                        | Reverse | 5'-GGATCACTAGTAAGCTTAGATCTTAAATAAAGTCTCACC-3' |

### List of miRNA mimic, inhibitor and primer sequence used in the manuscript

### Supplementary Figure 1

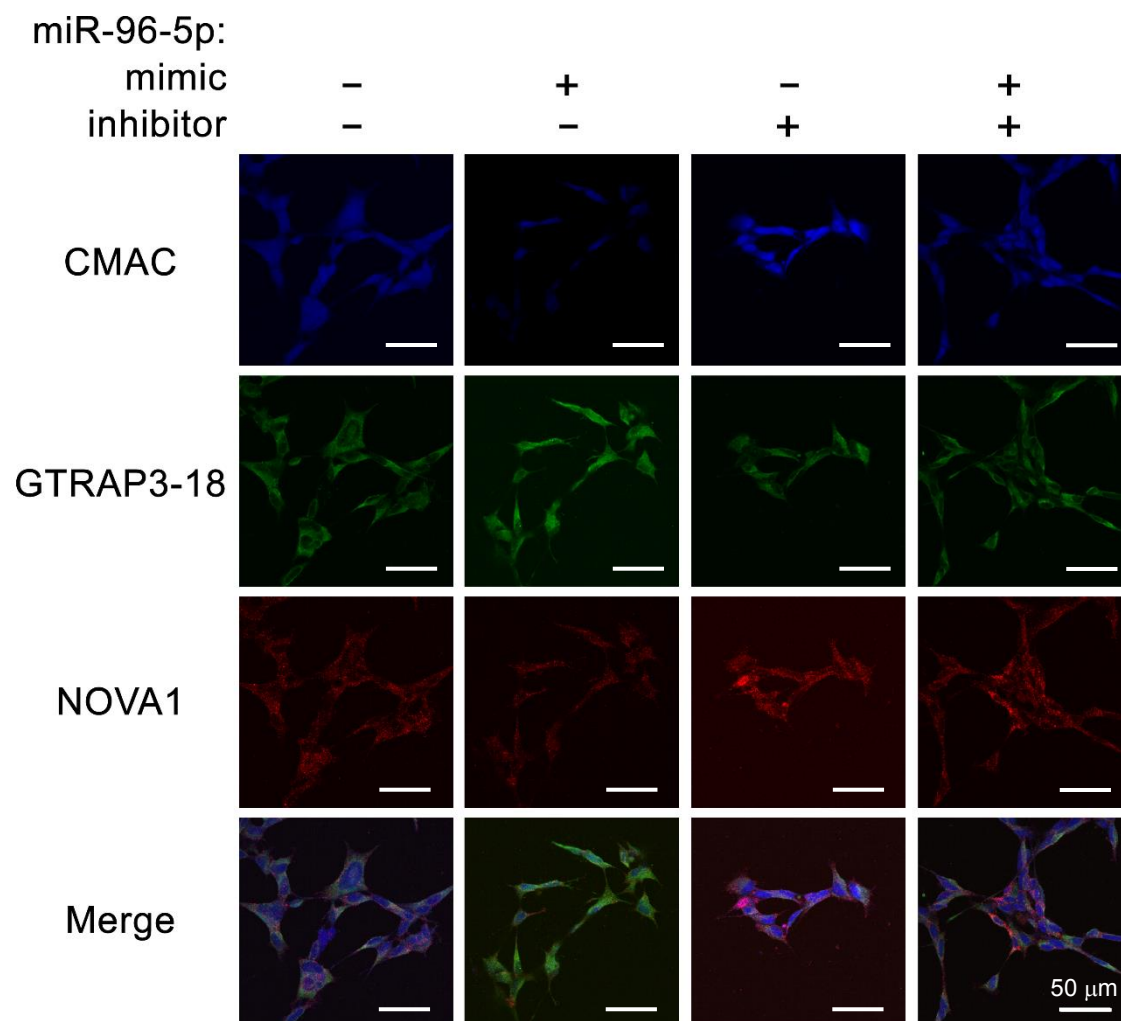

#### The effect of miR-96-5p mimic and/or inhibitor transfection in SH-SY5Y cells

Confocal images show the effect of miR-96-5p mimic and/or inhibitor transfection on the intensity of CMAC as a marker of GSH (blue), the expressions of GTRAP3-18 (green) and NOVA1 (red). Scale bar, 50 $\mu$ m.

## Supplementary Figure 2

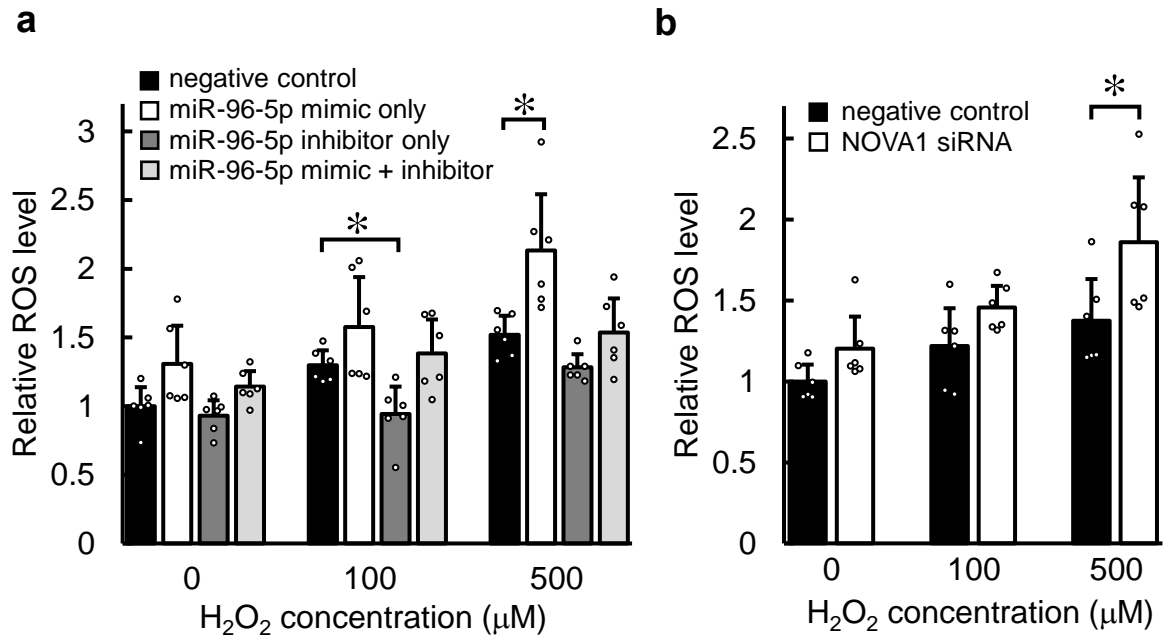

### The effect of miR-96-5p mimic and/or inhibitor transfection on ROS level in Neuro2a cells

**a** Relative ROS levels in Neuro2a cells transfected with appropriate combination of miR-96-5p mimic and/or inhibitor are shown. Data represent mean values  $\pm$  SD obtained from six independent experiments and were plotted as individual data points from each experiment. Data were analyzed by one-way ANOVA ( $F(3,20)=5.23$ ,  $p=0.0079$  for 100  $\mu\text{M}$  H<sub>2</sub>O<sub>2</sub> treatment,  $F(3,20)=9.21$ ,  $p=0.00050$  for 500  $\mu\text{M}$  H<sub>2</sub>O<sub>2</sub> treatment) and Tukey's HSD test. \* $p<0.05$  relative to the negative control in each H<sub>2</sub>O<sub>2</sub> concentration. **b** Relative ROS levels in Neuro2a cells transfected with NOVA1 siRNA or negative control are shown. Data represent mean values  $\pm$  SD obtained from six independent experiments and were plotted as individual data points from each experiment. Data were analyzed by Student's t-test, two-sided. \* $p<0.05$  relative to the negative control in each H<sub>2</sub>O<sub>2</sub> concentration.

### Supplementary Figure 3

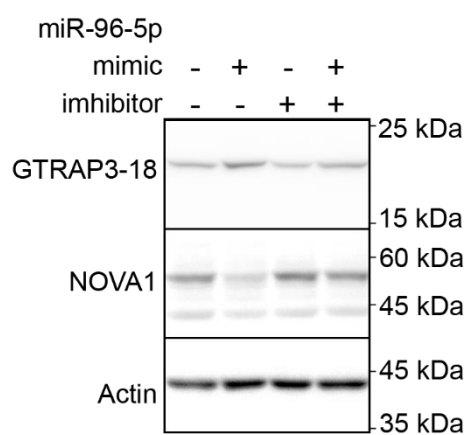

#### **The effect of miR-96-5p on the expressions of GTRAP3-18 and NOVA1 in HEK293 cells**

The endogenous expressions of GTRAP3-18, NOVA1 and  $\beta$ -actin in HEK293 cells with transfection of miR-96-5p mimic and/or inhibitor are shown. Molecular weight markers are depicted at right.

**Supplementary Figure 4**

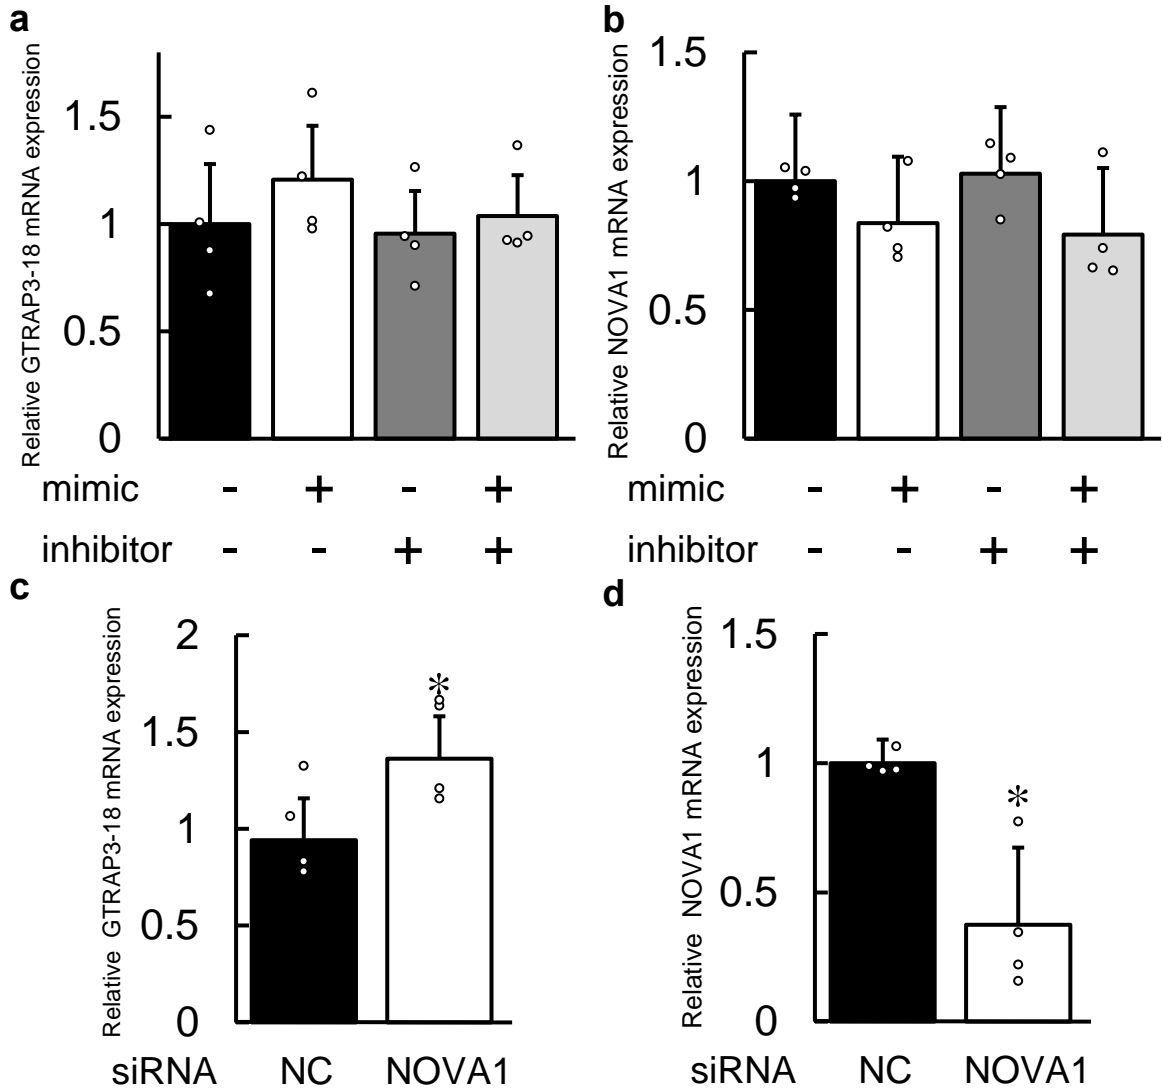

**Changes in the mRNA expression of GTRAP3-18 and NOVA1 with manipulation of miR-96-5p or NOVA1 expression**

**a, b** Relative mRNA expressions of GTRAP3-18 (panel **a**) or NOVA1 (panel **b**) with transfection of miR-96-5p mimic and/or inhibitor are shown. Data represent mean values  $\pm$  SD obtained from four independent experiments and were plotted as individual data points from each experiment. Data were analyzed by one-way ANOVA (For GTRAP3-18 expression;  $F(3,12)=0.99$ ,  $p=0.43$ , For NOVA1 expression;  $F(3,12)=2.32$ ,  $p=0.13$ ). **c, d** Relative mRNA expressions of GTRAP3-18 (panel **c**) or NOVA1 (panel **d**) with transfection of NOVA1 siRNA or negative control (NC) siRNA are shown. Data represent mean values  $\pm$  SD obtained from four independent experiments and were plotted as individual data points from each experiment. Data were analyzed by Student's t-test, two-sided. \* $p<0.05$  relative to the negative control.

**Supplementary Figure 5**

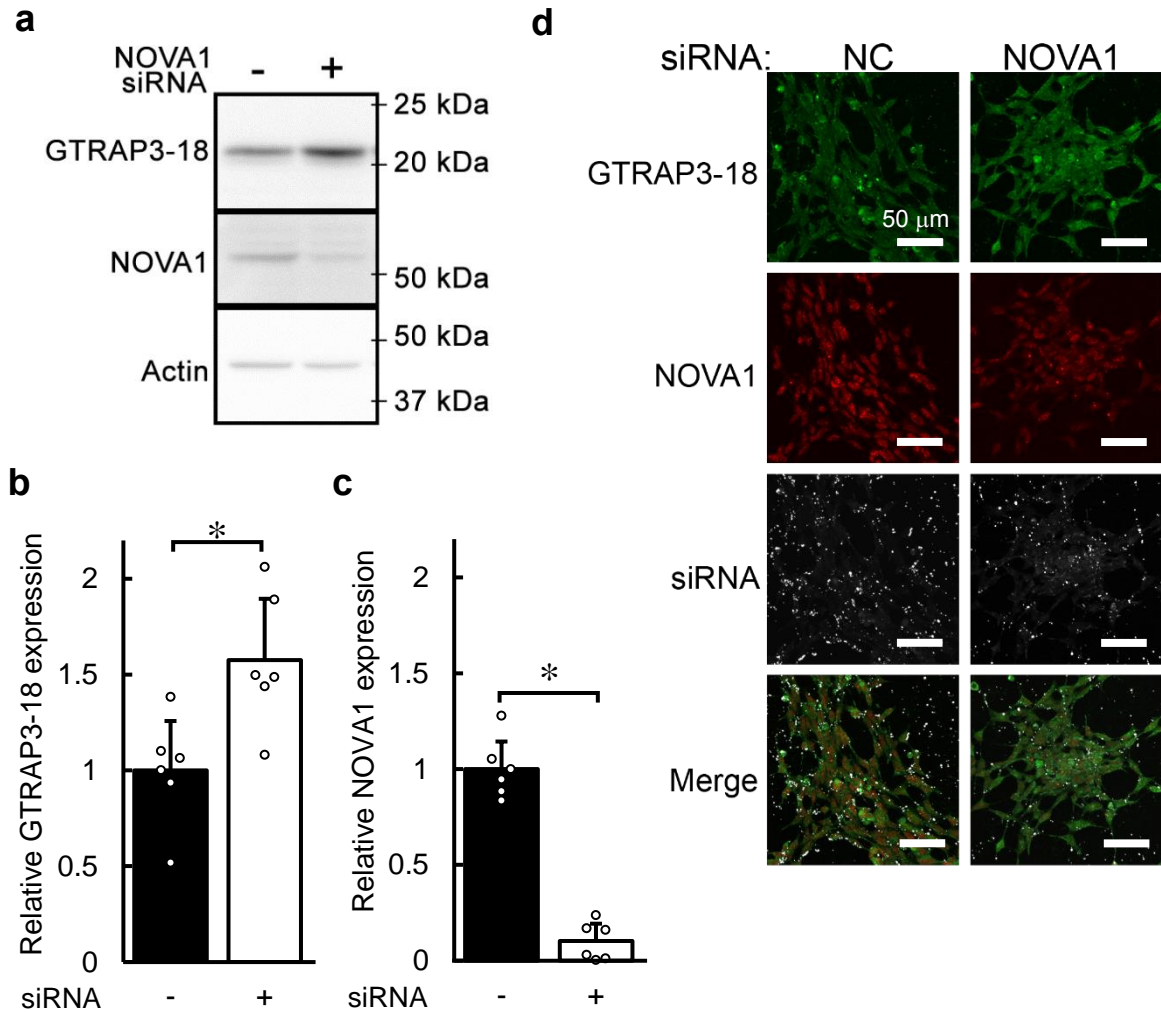

**The effect of NOVA1 siRNA transfection in HEK293 and SH-SY5Y cells**

**a** The endogenous expressions of GTRAP3-18, NOVA1 and  $\beta$ -actin after transfection of negative control (-) or NOVA1 siRNA (+) in HEK293 cells are shown. Molecular weight markers are depicted at right. **b, c** Quantification of the GTRAP3-18 (panel **b**) or NOVA1 (panel **c**) expression in panel **a** by densitometry. Data represent mean values  $\pm$  SD obtained from six independent experiments and were plotted as individual data points from each experiment. Data were analyzed by Student's t-test, two-sided.

\* $p < 0.05$  relative to the negative control. **d** Confocal images showing the effect of the NOVA1 siRNA or negative control (NC) transfection (white) on the intensity GTRAP3-18 (green) and NOVA1 (red). Scale bar, 50  $\mu$ m.



## Supplementary Figure 6

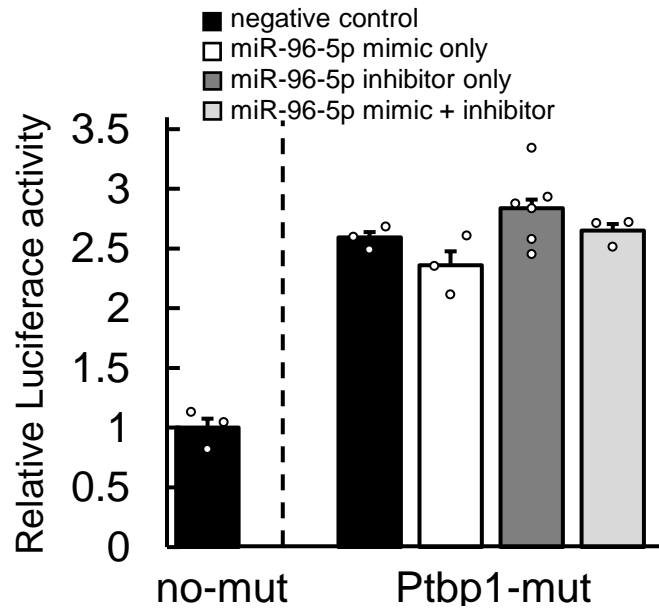

### The effect of inserting mutation at predicted NOVA1 binding site on the 3'-UTR of GTRAP3-18.

Relative luciferase activity in SH-SY5Y cells transfected with the luciferase plasmids in Fig. 4d with negative control ( $n=3$ ), miR-96-5p mimic only ( $n=3$ ), miR-96-5p inhibitor only ( $n=6$ ) or miR-96-5p mimic plus inhibitor ( $n=3$ ) are shown. Data represent mean values  $\pm$  SD and were plotted as individual data points. Data were analyzed by one-way ANOVA ( $F(3,11)=2.67$ ,  $p=0.099$ ).

Supplementary Figure 7

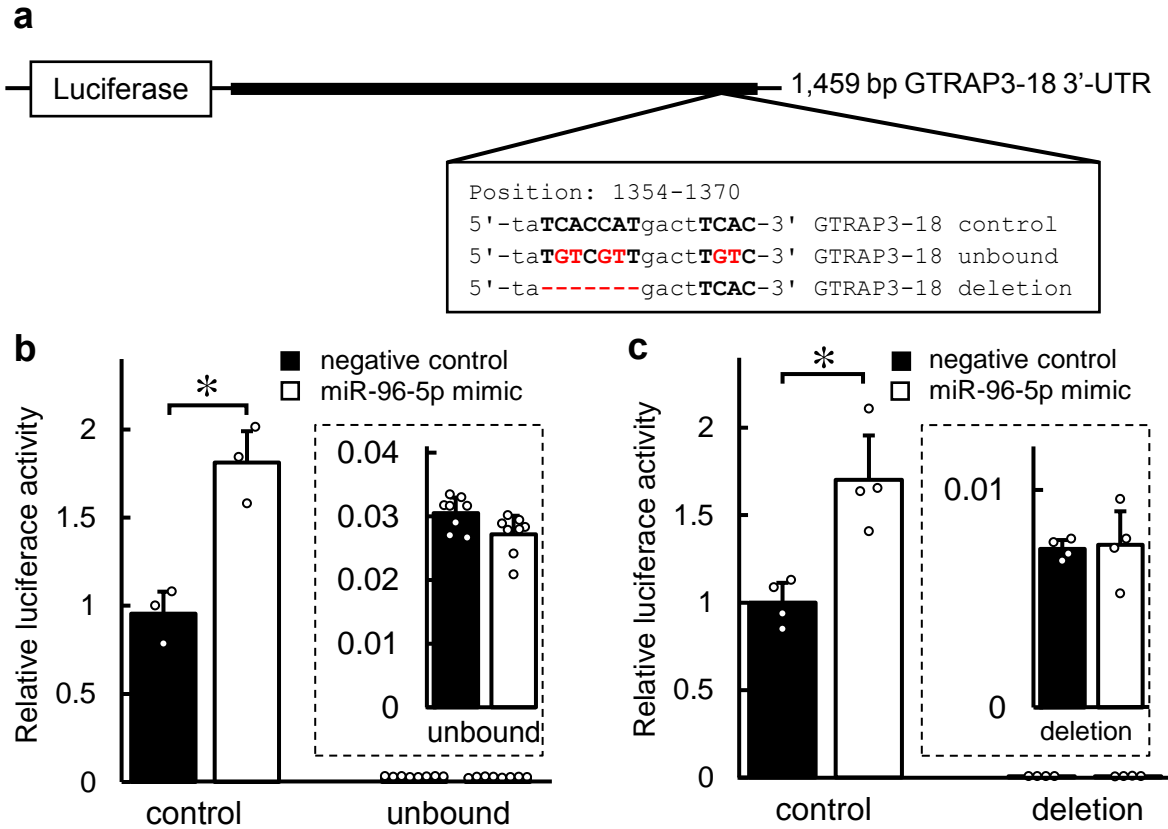

**The effect of inserting point or deletion mutations at predicted NOVA1 binding site on the 3'-UTR of GTRAP3-18.** **a** A schematic plot of the luciferase plasmids of GTRAP3-18 3'-UTR. The sequence for the predicted NOVA1 binding site is shown. A part of YCAAY clusters (bold font) was mutated or deleted (red font). Constructs with either point mutant (unbound) or deletion mutant (deletion) were predicted not to be able to bind with any RBPs including NOVA1. **b** Relative luciferase activity in SH-SY5Y cells transfected with luciferase constructs in **a** with miR-96-5p mimic or negative control are shown. Data represent mean values  $\pm$  SD obtained from independent samples ( $n=3$  for control,  $n=8$  for unbound mutant) and were plotted as individual data points. Data were analyzed by Student's t-test, two-sided.  $*p < 0.05$  relative to negative control. Inset; enlargements of the graph using luciferase construct with unbound mutant. **c** Relative luciferase activity in SH-SY5Y cells transfected with luciferase constructs in **a** with miR-96-5p mimic or negative control are shown. Data represent mean values  $\pm$  SD obtained from four independent experiments and were plotted as individual data points. Data were analyzed by Student's t-test, two-sided.  $*p < 0.05$  relative to negative control. Inset; enlargements of the graph using luciferase construct with deletion mutant.

Supplementary Figure 8

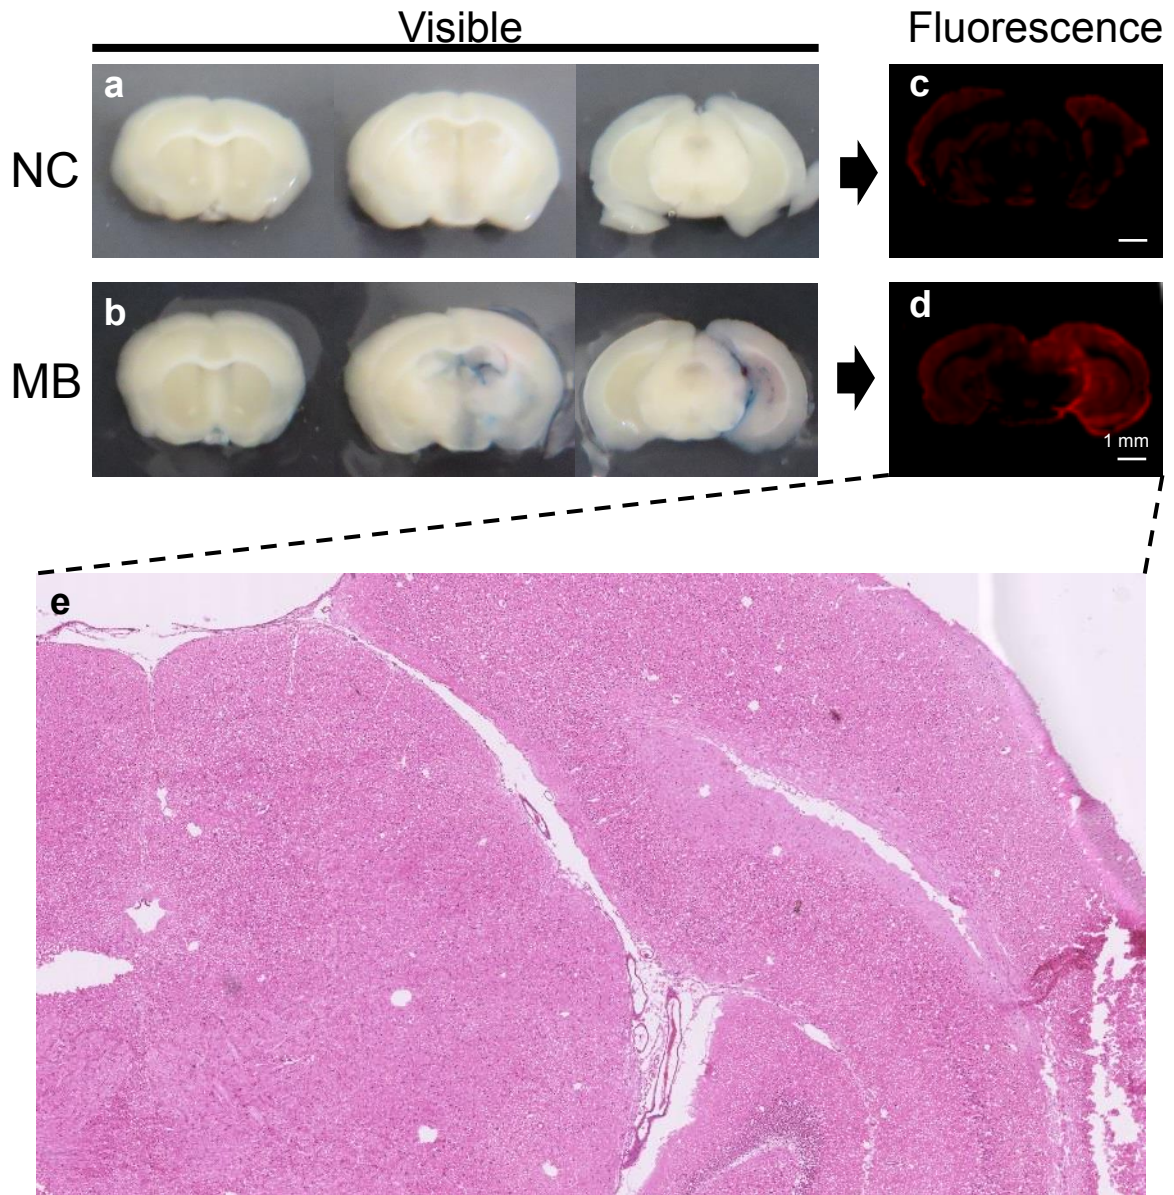

**Blood-brain-barrier leakage of Evans blue in the treated side of hippocampus**

**a-d** Photographs of coronal brain slices after intra-arterial administration of Evans blue with (MB) or without (NC) microbubbles were shown. Panel **a** and **b** shows visual images of brain slice series. Panel **c** and **d** shows the Evans blue fluorescence detection with 620 nm excitation and 680 nm emission. Scale bar, 1 mm. **e** Staining of coronal brain slice in panel **d** with hematoxylin and eosin showed histologically no hallmark of brain damage.

Supplementary Figure 9

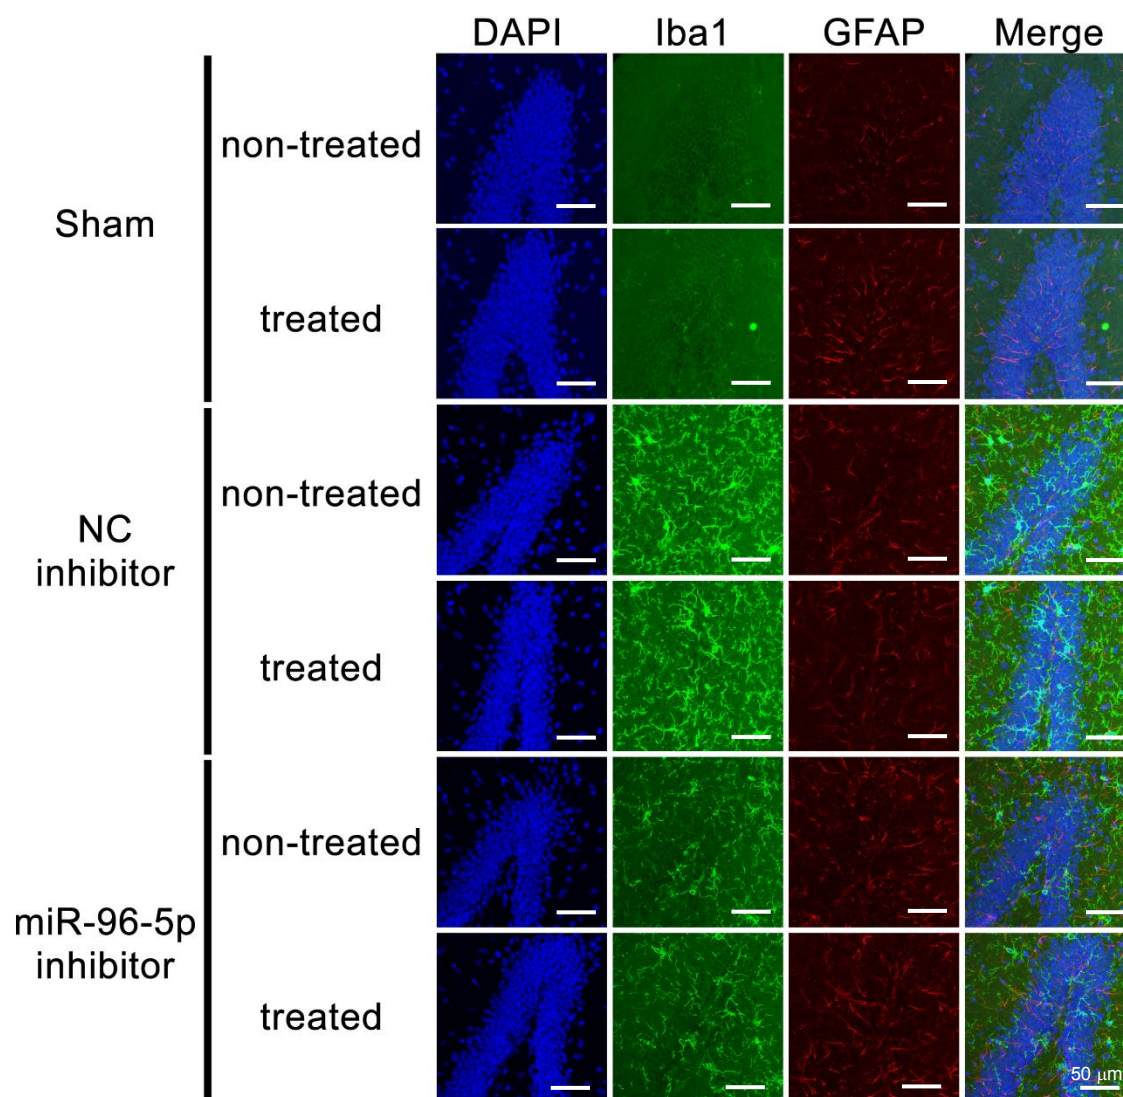

**Effect of the intra-arterial administration of miR-96-5p inhibitor with microbubbles and ultrasound on microglial and glial activation.** Confocal images show the effect of administration of miR-96-5p inhibitor or negative control (NC) inhibitor on the expressions of Iba1 (green) as microglial marker and GFAP (red) as a glial marker. The nuclei were stained with DAPI (blue). To see the effect of ultrasound (US), the result of sham operation without US application (sham) is also shown. Scale bar, 50 μm.



Supplementary Figure 10

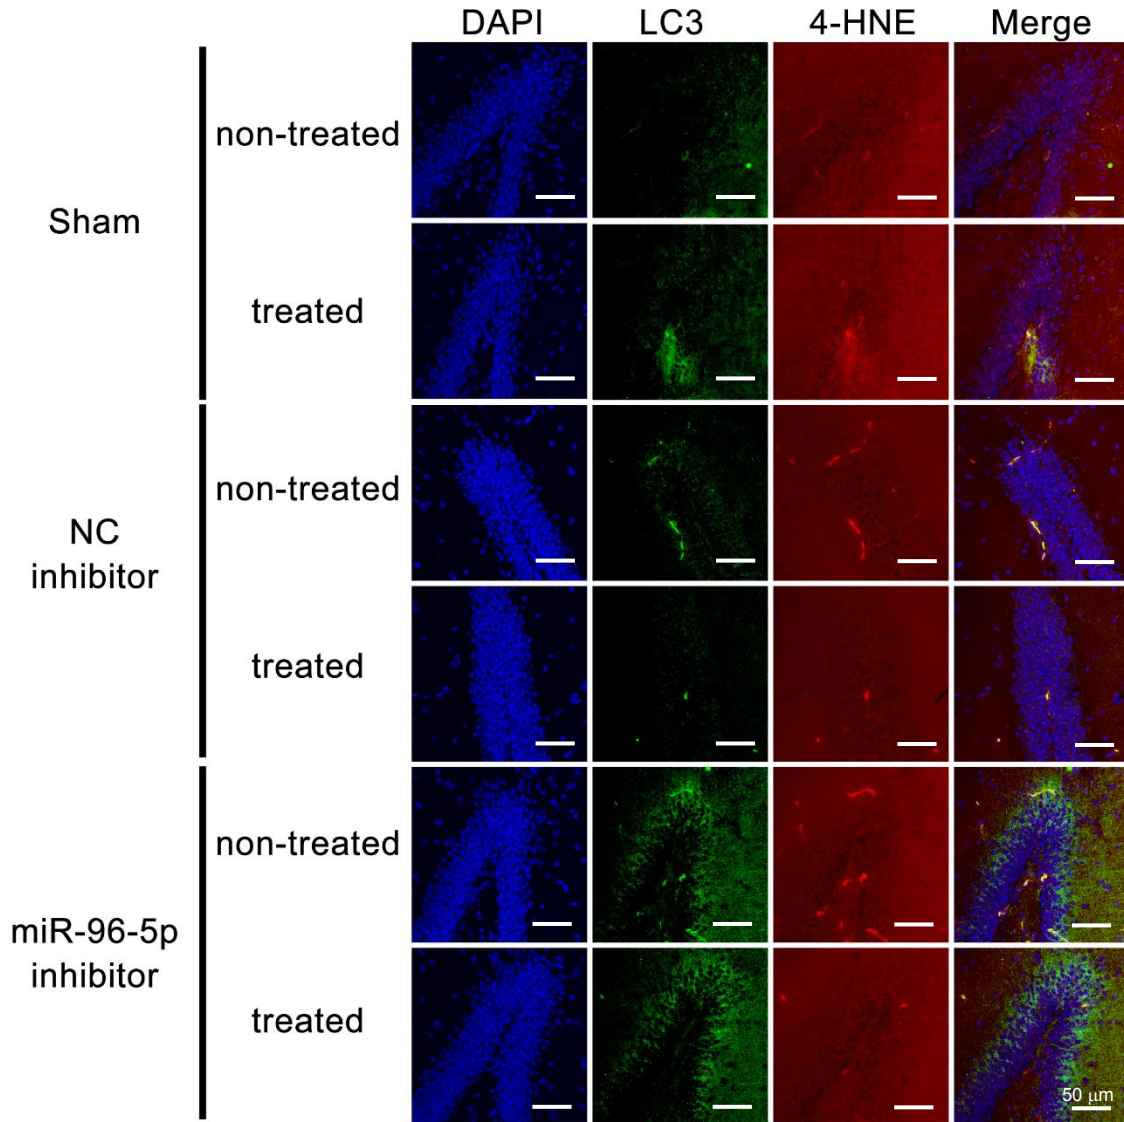

**Effect of the intra-arterial administration of miR-96-5p inhibitor with microbubbles and ultrasound on autophagy activation and lipid oxidation.**

Confocal images show the effect of administration of miR-96-5p inhibitor or negative control (NC) inhibitor on the expressions of LC3 (green) as a marker of autophagy and 4-HNE (red) as a marker of lipid oxidation. The nuclei were stained with DAPI (blue). To see the effect of ultrasound (US), the result of sham operation without US application (sham) is also shown. Scale bar, 50 μm.

## Supplementary Figure 11

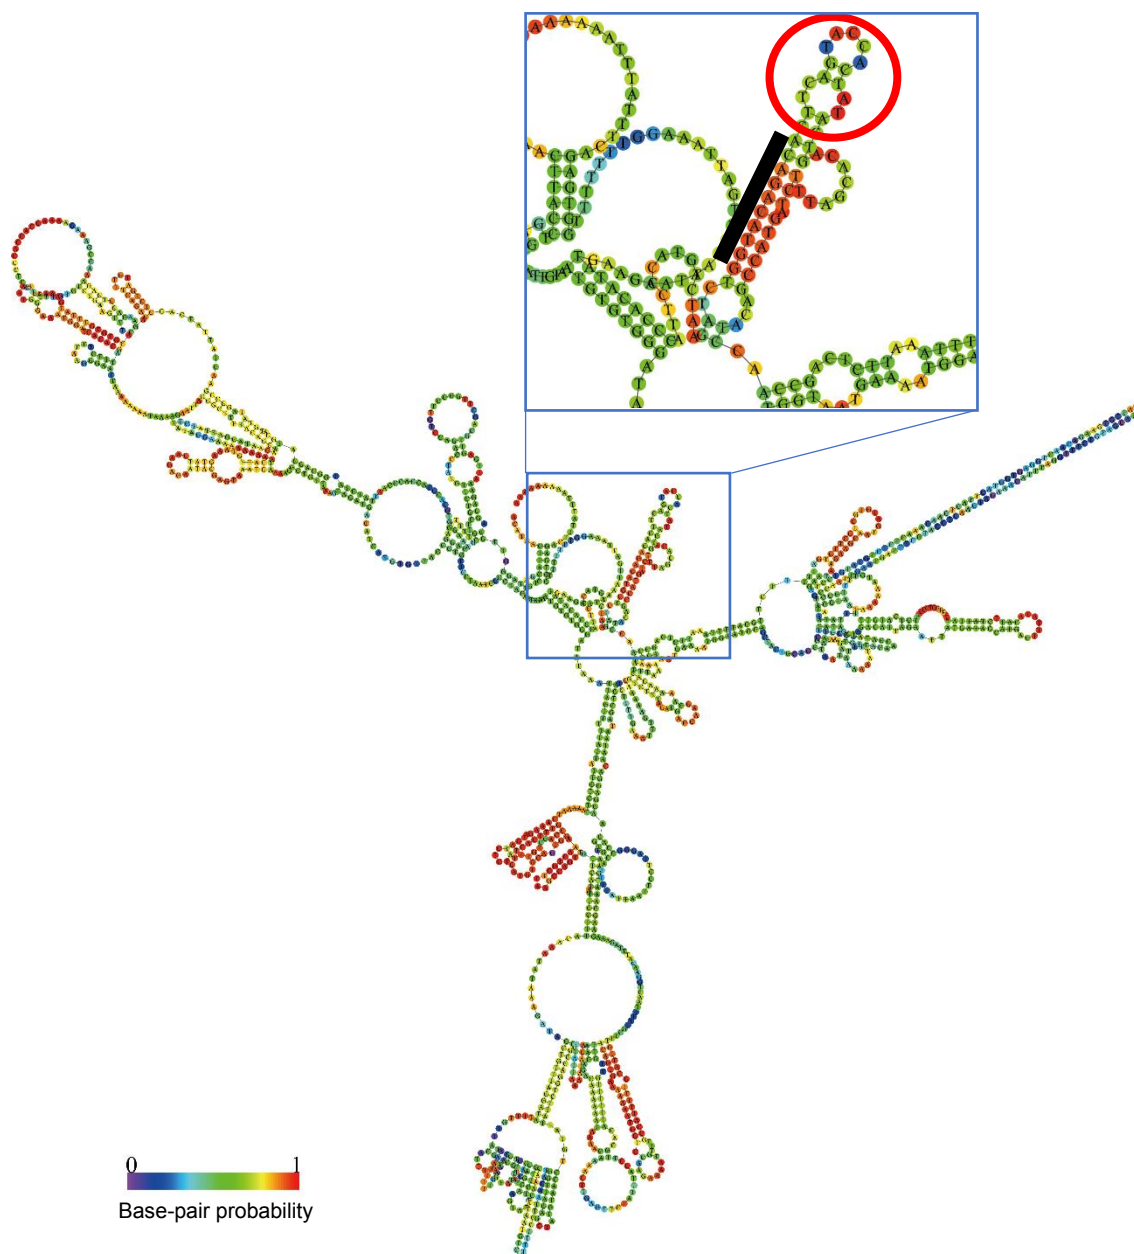

### **Predicted conformation of the GTRAP3-18 3'-UTR**

A schematic representation of the conformation of the GTRAP3-18 3'-UTR containing predicted NOVA1 binding site (red circle) and a miRNA target site (black line) as predicted by Vienna RNAfold software (RNAfold Web Server; <http://rna.tbi.univie.ac.at/cgi-bin/RNAWebSuite/RNAfold.cgi>). Base-pair probability is indicated in the legend.

## Supplementary Figure 12

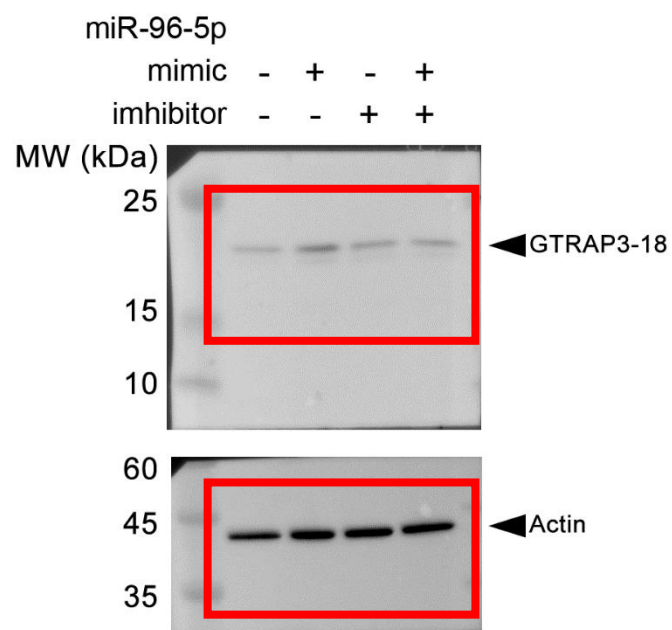

### Original blots presented in Fig. 1c

Merged images of full blots and blotting membrane with pre-stained molecular weight marker are shown. Molecular weight is indicated on the left. Red squares indicate cropped sections.

Supplementary Figure 13

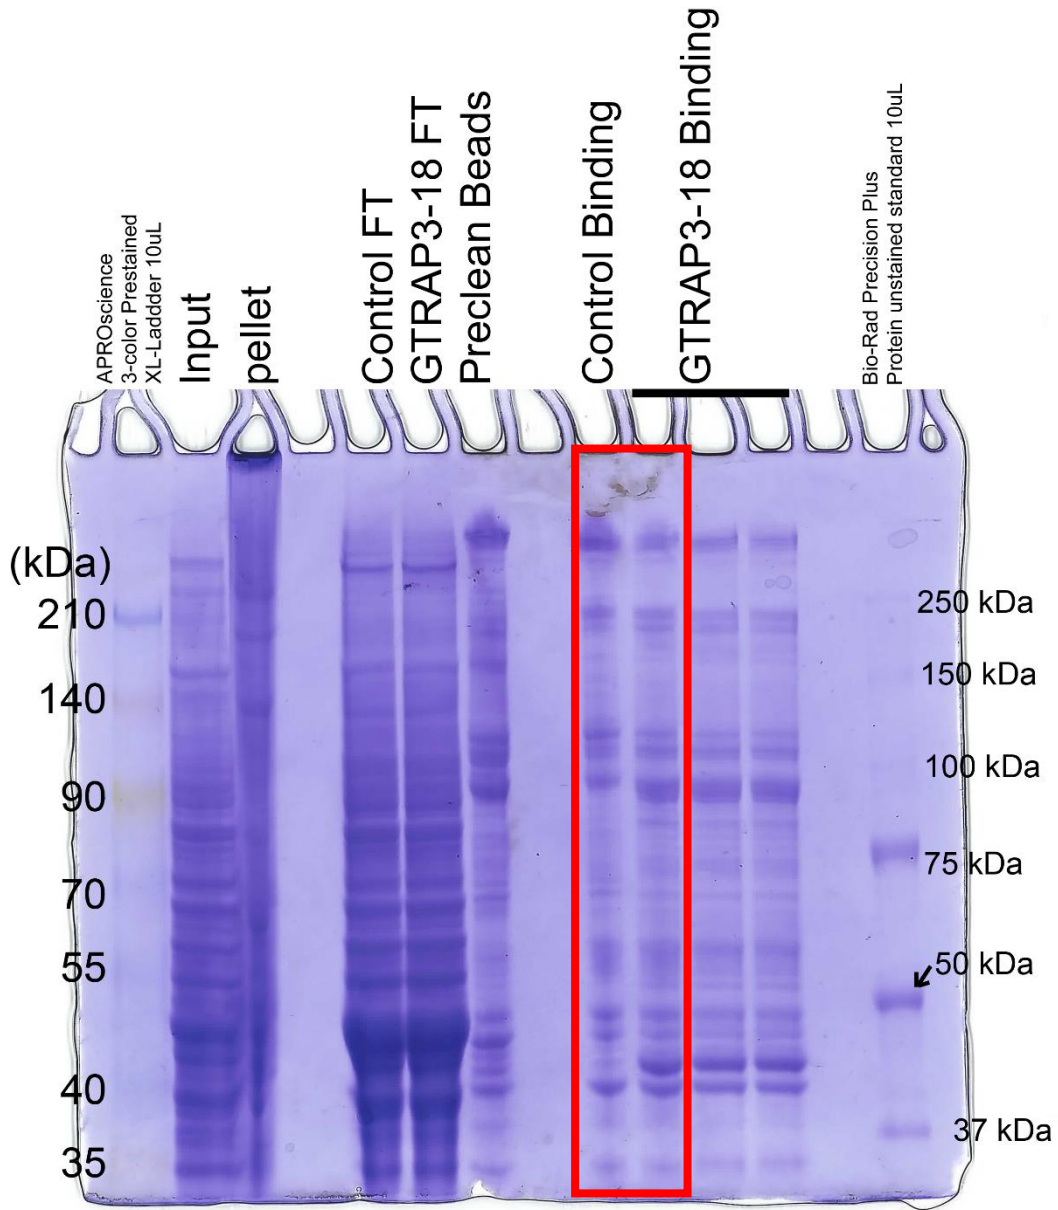

**Original CBB-stained gel presented in Fig. 2b**

The whole gel which was stained with CBB is shown. Molecular weight markers are indicated on the right and left side of the gel. Red squares indicate cropped sections



## Supplementary Figure 14

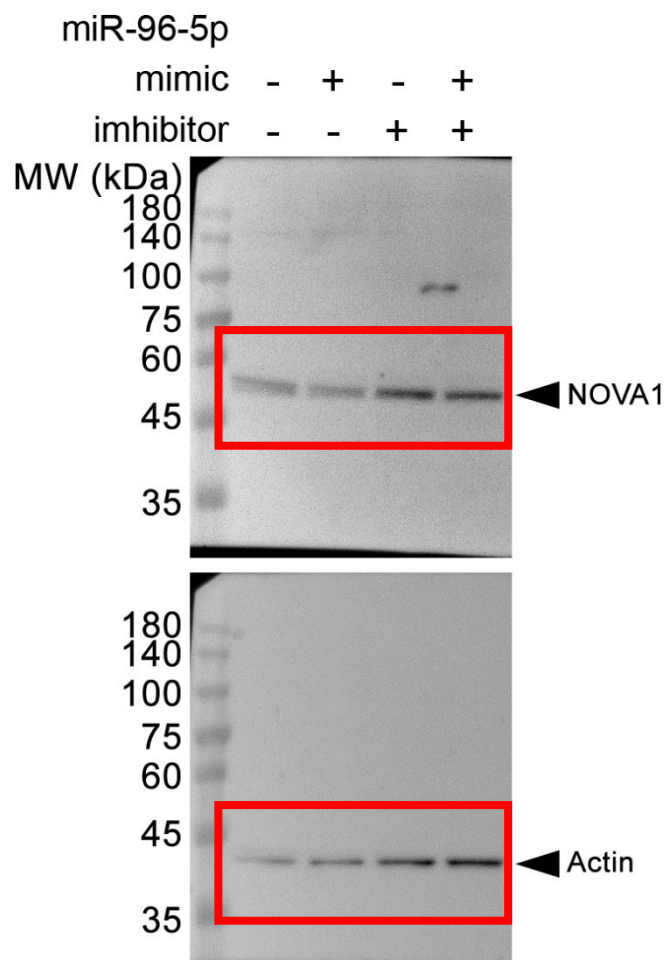

### Original blots presented in Fig. 3a

Merged images of full blots and blotting membrane with pre-stained molecular weight marker are shown. Molecular weight is indicated on the left. Red squares indicate cropped sections.

## Supplementary Figure 15

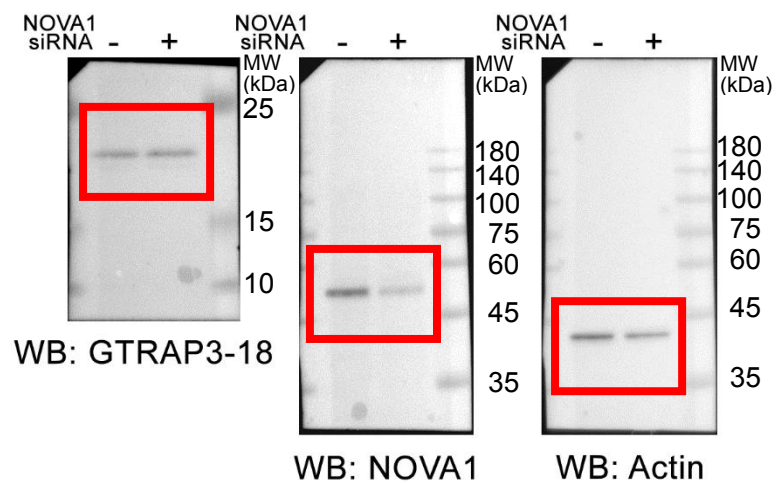

### Original blots presented in Fig. 4a

Merged images of full blots and blotting membrane with pre-stained molecular weight marker are shown. Molecular weight is indicated on the right of the blots. Red squares indicate cropped sections.
