# Supplementary material for: Inhibition of miR-96-5p in the mouse brain increases glutathione levels by altering NOVA1 expression
Source: PubMed Central journal article supplement (PMC7876013; doi:10.1038/s42003-021-01706-0), 2021-02-10
Supplement: 42003_2021_1706_MOESM10_ESM.pdf [file 42003_2021_1706_MOESM10_ESM.pdf]

## **Description of Additional Supplementary Files**

**File name:** Supplementary Data 1

**Description:** Source data underlying Fig. 1.

**File name:** Supplementary Data 2

**Description:** Source data underlying Fig. 3.

**File name:** Supplementary Data 3

**Description:** Source data underlying Fig. 4.

**File name:** Supplementary Data 4

**Description:** Source data underlying Fig. 5

**File name:** Supplementary Data 5

**Description:** Source data underlying Supplementary Table 1.

**File name:** Supplementary Data 6

**Description:** Source data underlying Supplementary Table 2.

**File name:** Supplementary Data 7

**Description:** Source data underlying Supplementary Figure 2, 4, 5, 6 and 7.
